# Supplementary material for: Zinc induced polyelectrolyte coacervate bioadhesive and its transition to a self-healing hydrogel
Source: Royal Society of Chemistry journal article supplement (doi:10.1039/c5ra11915d), 2015-01-01
Supplement: c5ra11915d1.pdf [file c5ra11915d1.pdf]

## Supporting Information

# **Zinc induced coacervate bioadhesive and its transition to self-healing hydrogel**

Weina Wang<sup>1,2,//</sup> Yisheng Xu,<sup>1,//\*</sup> Ang Li<sup>1</sup>, Tao Li<sup>1</sup>, Miaomiao Liu<sup>1</sup>, Regine von Klitzing<sup>2</sup>,  
Christopher K. Ober<sup>3</sup>, A. Basak Kayitmazer<sup>4</sup>, Li Li<sup>1</sup> and Xuhong Guo<sup>1,5\*</sup>

<sup>1</sup>State Key Laboratory of Chemical Engineering, East China University of Science and Technology,  
Shanghai 200237, People's Republic of China.

<sup>2</sup>Stranski-Laboratorium für Physikalische und Theoretische Chemie, Technische Universität Berlin,  
Strasse des 17. Juni 124, D-10623 Berlin, Germany

<sup>3</sup>Department of Materials Science and Engineering, Cornell University, Ithaca, NY 14853-1501,  
USA

<sup>4</sup>Chemistry Department, Bogazici University, Bebek, Istanbul 34342, Turkey

<sup>5</sup>Key Laboratory of Materials-Oriented Chemical Engineering of Xinjiang Uygur Autonomous  
Region and Engineering Research Center of Materials-Oriented Chemical Engineering of Xinjiang  
Bingtuan, Shihezi University, Xinjiang 832000, People's Republic of China

//These two authors contributed equally to this work.

\*To whom correspondence should be addressed. E-mail: yshxu@ecust.edu.cn (Yisheng Xu) and  
guoxuhong@ecust.edu.cn (Xuhong Guo)

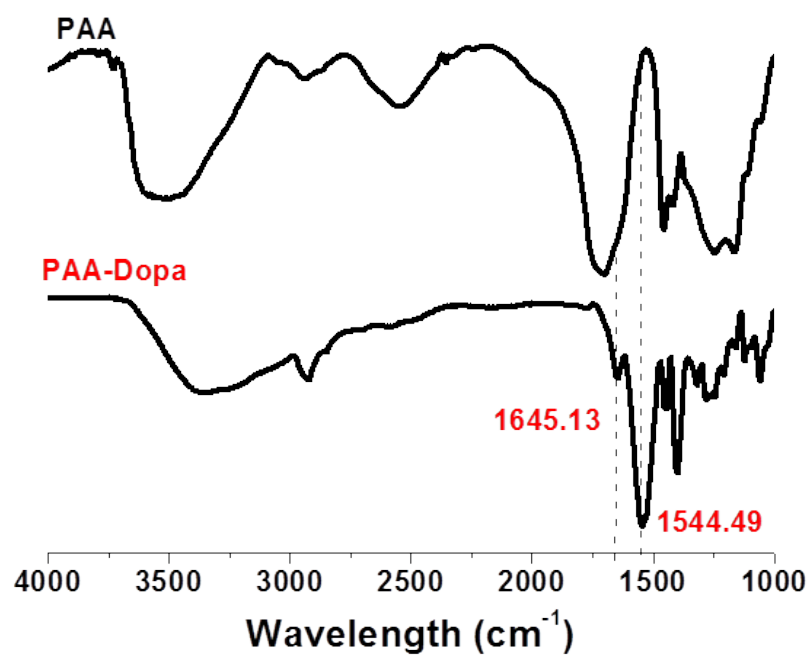

**Figure S1.** FT-IR spectra of PAA and PAA-Dopa.

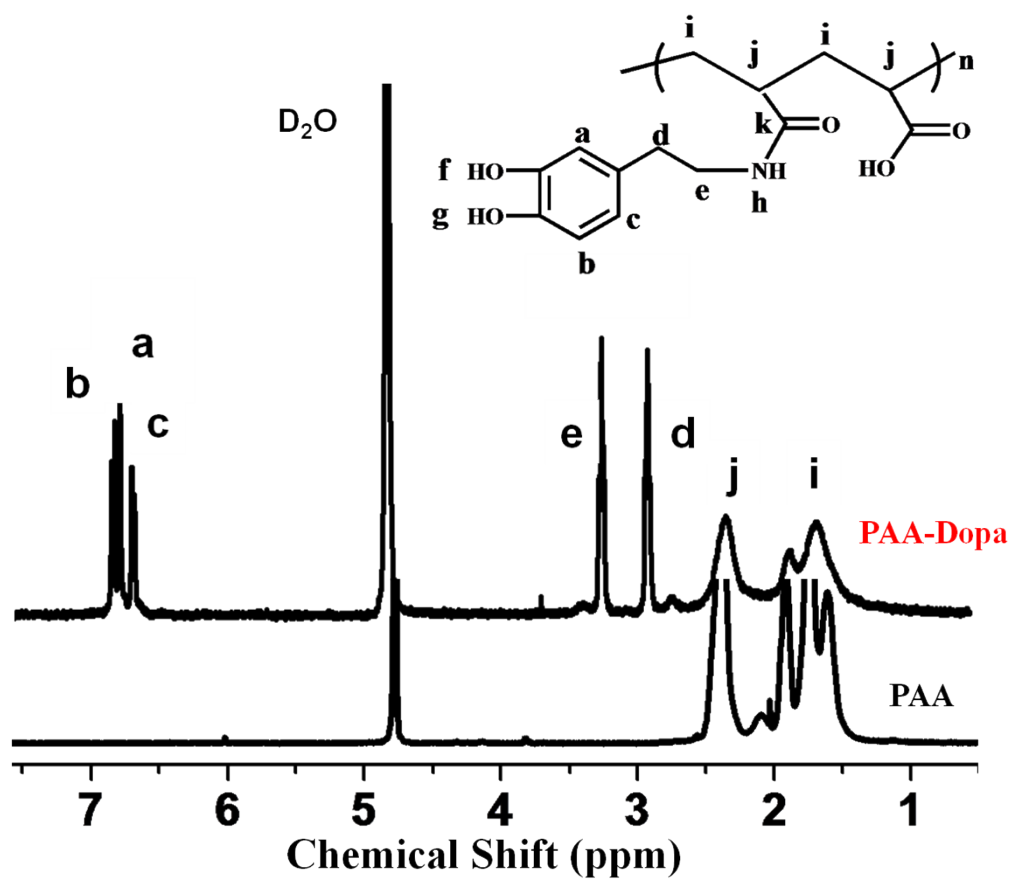

**Figure S2.**  $^1\text{H}$ -NMR spectra of PAA and PAA-Dopa.

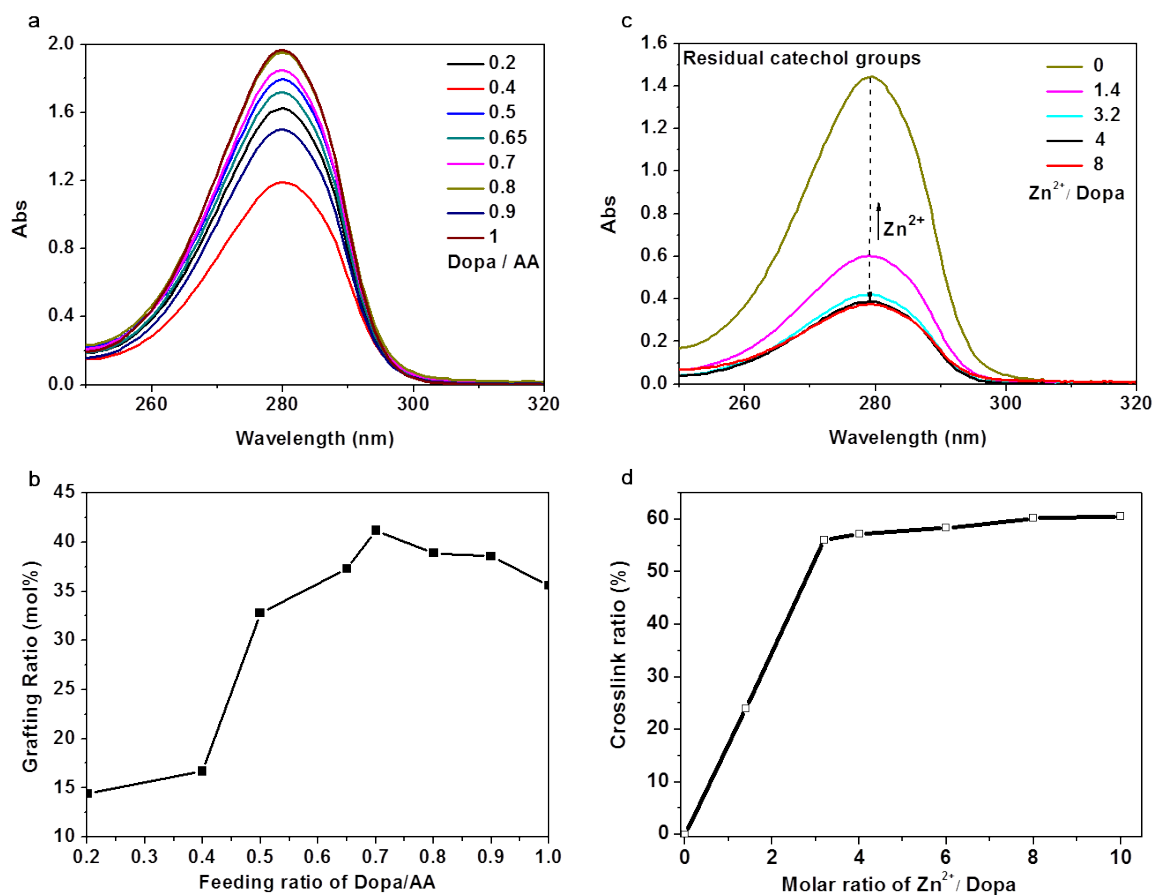

**Figure S3.** UV-vis detection of Dopa content (pH = 4, 100 mg/mL PAA-Dopa). (a, b) Grafting ratio ranges with different feeding ratio of Dopa/AA. (c, d) Cross-linking degree with increasing ratio of Zn<sup>2+</sup>/Dopa.

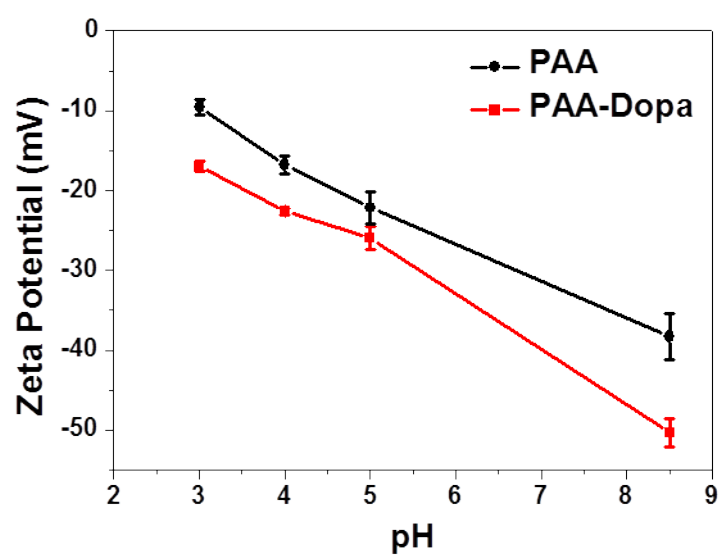

**Figure S4.** Zeta potential of PAA and PAA-Dopa at different pHs.

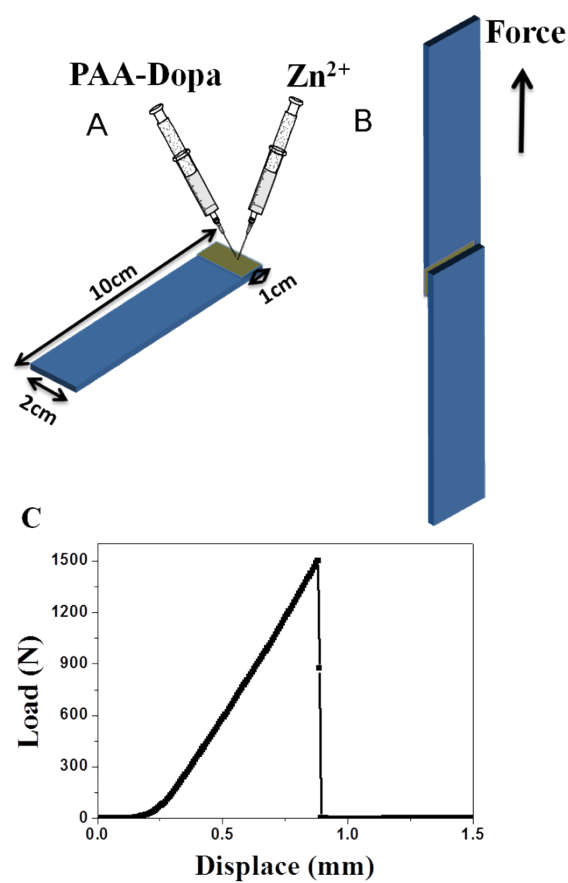

**Figure S5.** (A) The injectable sample preparation of PAA-Dopa/Zn coacervates at pH 4. (B) The schematic diagram of two bonded plates preparing to be pulled apart. (C) The original data from lap-shear test where the maximum adhesive force indicates the failure force of adhesion.

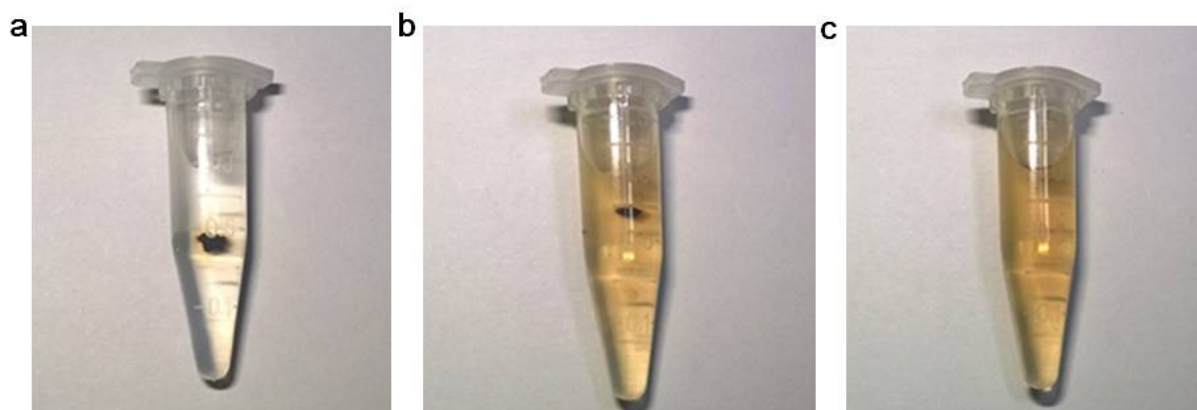

**Figure S6.** EDTA treatment of zinc cross-linked PAA-Dopa hydrogel. From left to right, the dissolving process.

Video. At fixed Dopa grafting ratio (30%), PAA-Dopa solution was added to Zn liquid and immediately form crosslinked “coacervate” like viscous fluid (video, Supporting information).
